# 1 Human walking in the real world: Interactions between terrain type, 2 gait parameters, and energy expenditure

3

4 Submitted to PLoS One

5

6 Kowalsky DB<sup>1</sup>, Rebula, JR<sup>1</sup>, Ojeda LV<sup>1</sup>, Adamczyk PG<sup>2</sup>, Kuo, AD<sup>1,3</sup>

7 <sup>1</sup>Department of Mechanical Engineering, University of Michigan, Ann Arbor

8 <sup>2</sup>Department of Mechanical Engineering, University of Wisconsin, Madison

9 <sup>3</sup>Department of Biomedical Engineering, University of Michigan, Ann Arbor

10

## 11 Abstract

12 Humans often traverse real-world environments with a variety of surface irregularities and  
13 inconsistencies, which can disrupt steady gait and require additional effort. Such effects have, however,  
14 scarcely been demonstrated quantitatively, because few laboratory biomechanical measures apply  
15 outdoors. Walking can nevertheless be quantified by other means. In particular, the foot's trajectory in  
16 space can be reconstructed from foot-mounted inertial measurement units (IMUs), to yield measures of  
17 stride and associated variabilities. But it remains unknown whether such measures are related to  
18 metabolic energy expenditure. We therefore quantified the effect of five different outdoor terrains on foot  
19 motion (from IMUs) and net metabolic rate (from oxygen consumption) in healthy adults (N = 10;  
20 walking at 1.25 m/s). Energy expenditure increased significantly (P < 0.05) in the order Sidewalk, Dirt,  
21 Gravel, Grass, and Woodchips, with Woodchips about 27% costlier than Sidewalk. Terrain type also  
22 affected measures, particularly stride variability and virtual foot clearance (swing foot's lowest height  
23 above consecutive footfalls). In combination, such measures can also roughly predict metabolic cost  
24 (adjusted  $R^2 = 0.52$ , partial least squares regression), and even discriminate between terrain types (10%  
25 reclassification error). Body-worn sensors can characterize how uneven terrain affects gait, gait  
26 variability, and metabolic cost in the real world.

27

28 Key words: Biomechanics, inertial measurement units, locomotion, metabolic energy, foot motion,  
29 uneven terrain

30

31 A. D. Kuo, corresponding author present address: [arthur.kuo@ucalgary.ca](mailto:arthur.kuo@ucalgary.ca), Faculty of Kinesiology &  
32 Program in Biomedical Engineering, University of Calgary, Calgary, Alberta, CANADA

## 33 Introduction

34 The metabolic energy cost for human walking varies considerably with terrain. For example, loose sand  
35 can double the cost compared to a smooth, hard surface [1,2]. Overall energy expenditure is also  
36 determined by other variables such as carried load, movement speed, and grade or ground slope [3–5],  
37 each with readily identifiable effects. But the effect of terrain could depend on more complex factors such  
38 as unevenness of the surface, its compliance and energy absorbing properties, and looseness and  
39 instability of the substrate. That complexity is typically avoided in predictions of metabolic cost, in favor  
40 of a single multiplicative factor, the *terrain coefficient*, for the relative gross metabolic cost compared to  
41 treadmill walking. Typical values are 1.0 for blacktop surface, 1.2 for light brush, 1.5 for heavy brush,  
42 and 2.1 for loose sand [2]. But aside from this overall effect, there is presently scant understanding of how  
43 terrain affects a person’s actual movements and actions, which are the ultimate determinants of energy  
44 expenditure. If the gait adaptations for different terrains could be quantified, they might offer insight  
45 regarding the control of locomotion and improved predictions for its energetic cost.

46

47 It is challenging to determine the biomechanical adaptations for different terrains. Traditional laboratory  
48 measures include kinematics and ground reaction forces [6], which can yield mechanistic measures such  
49 as fluctuations in kinetic energy when walking on sand [1], or the work performed by the leg joints on an  
50 artificial, uneven treadmill surface [7], with attendant energetic cost. But such laboratory measures are  
51 difficult to obtain outdoors. This limitation favors simpler equipment such as body-worn accelerometers,  
52 whose signals can be correlated with energy expenditure [e.g., 8–12], albeit with limited ability to  
53 distinguish terrain type [13]. Yet another possibility is to use shoe-mounted inertial measurement units  
54 (combining accelerometers and gyroscopes) to reconstruct the foot’s path in space and placement on  
55 ground [14,15]. These data can reveal trends in walking speed, stride length, and stride variability [16],  
56 which may in turn reveal the effects of real-world terrain.

57

58 Ground terrain could have various effects on the foot’s motion during walking. Most obvious is the  
59 elevation change over a step, which is energetically costly for a net elevation increase [17], and might  
60 also increase cost for terrain that undulates from step to step with no overall slope. Terrain might also  
61 affect parameters such as average stride length and width, which also determine energy expenditure [e.g.,  
62 18,19]. Uneven terrain may require the foot to be lifted higher mid-swing [20], with an attendant cost  
63 [21]. Finally, balance might be more challenging on some terrains, requiring stabilizing adjustments [22]  
64 including foot placement [7,23]. Thus, motion of the foot may entail energy expenditure.

65

66 The purpose of this study was to determine how foot paths change with terrain, and how they relate to the  
67 energetic cost of walking. Here, *foot path* refers to the foot's translation in three dimensions during a  
68 single swing phase, starting from the previous stance phase and including the ending stance phase, when  
69 the foot is stationary. We tested whether this path exhibits changes in standard gait measures, such as  
70 average stride length and height and their respective variabilities, as a function of terrain. We also tested  
71 these measures for correlation with energy expenditure, to examine the possible link between foot path,  
72 energy cost, and terrain.

73

## 74 **Methods**

75 We measured healthy adults walking on five types of common outdoor surfaces: Sidewalk, Dirt, Gravel,  
76 Grass, and Woodchips (see Figure 1). The experiment was performed outdoors in Nichols Arboretum  
77 (Ann Arbor, MI), a University-operated park with well-groomed walking trails, selected to pose little  
78 challenge to any healthy individual. For all conditions, subjects followed trails intended for walking,  
79 except for Grass which was in a meadow without a specific trail. All of the surfaces were selected to have  
80 very little elevation change, in terms of visible undulations, total change (maximum net grade of 0.96%  
81 on Gravel), and cross-slope. We measured metabolic energy expenditure, foot paths, and attendant stride  
82 parameters during walking. Stride information was collected using inertial measurement units (IMU)  
83 (Opal sensors, APDM Inc., Portland, OR) attached atop each foot. A global positioning system device  
84 (GPS; Garmin Ltd., Olathe, KS) was also used to characterize the route's speed, distance, and elevation.

85

## 86 **Experiment**

87 Ten adult subjects (N=10, 5 male and 5 female, age 18 - 48) participated in the study. Subjects had an  
88 average body mass of  $64.86 \pm 10.10$  kg (mean  $\pm$  s.d.) and an average leg length of  $0.90 \pm 0.07$  m (mean  $\pm$   
89 s.d.). Subjects provided written informed consent before the experiment. The study was approved by the  
90 University of Michigan Health Sciences Institutional Review Board (HUM00020554).

91

92 Subjects walked on each surface, presented in random order, for 8 minutes. Approximate speed of 1.25  
93 m/s was controlled by following the experimenter, who walked according to GPS speed and attempted to  
94 make only gentle speed corrections, to avoid costs for artificial speed fluctuations [24]. Some surfaces  
95 were limited in length, and so subjects reversed their direction and continued walking. Turns occurred at  
96 most 10 times per 8-minute trial.

97

98   Respirometry data were collected for the entirety of each trial (Oxycon Mobile, CareFusion Corp., San  
99   Diego, CA). To allow time to reach steady-state, only the last 3 minutes of data from each surface were  
100   used for metabolic energy expenditure. The rates of oxygen consumption and carbon dioxide production  
101   (mL/min) were converted to metabolic rate (W) using standard formulae [25,26]. Net metabolic rate  $\dot{E}_{\text{met}}$   
102   was calculated by subtracting metabolic rate of a separate quiet standing trial ( $97.29 \pm 27.06$  W) from  
103   gross. We also calculated a dimensionless net metabolic cost of transport, defined as the net energy  
104   expended to move a unit body weight a unit distance.

105  
106   For each trial, a total of 90 strides per foot were analyzed from forward walking sections at the beginning  
107   of the trial (Figure 2). Estimated foot paths were derived from IMU data according to an algorithm  
108   described previously [15]. Briefly, the method uses gyroscope and accelerometer data to estimate spatial  
109   orientation, and then integrates translational accelerations twice to yield displacements, with inertial drift  
110   reduced by correcting the velocities during stance to zero. Here, foot path actually refers to the path of the  
111   IMU, located on the instep of the shoe. From these paths, we computed gait parameters such as stride  
112   length, width, and height, all defined as displacements over one stride. To reduce the amount of data, only  
113   the left foot data were used for the measures reported here. We report average and root-mean-square  
114   (RMS, equivalent to standard deviation) variability of stride parameters, except for average stride width,  
115   which was unknown because each IMU recorded independent data for one foot, with no reference to the  
116   other foot. We also estimated two additional parameters defined by the foot's stationary positions at  
117   beginning and end of stride, and the straight line connecting those positions. Projected onto the sagittal  
118   plane, the *virtual clearance* was defined as the closest distance the foot reaches to this line (measured  
119   perpendicularly) during the middle of swing phase (illustrated in Figure 2), extending a measure  
120   previously defined for flat ground [27] to include different footfall heights. Projected onto the transverse  
121   plane, *lateral swing displacement* was defined as the maximum distance the foot departs from this line,  
122   also mid-way through the swing phase.

123  
124   Stride parameters and energy measures were normalized to account for differences in subject body size  
125   and height. We used body mass  $M$ , standing leg length  $L$  (defined as floor to greater trochanter), and  
126   gravitational acceleration  $g$  as base units. Thus, stride distances were normalized by  $L$ , and net metabolic  
127   power [28] by  $Mg^{1.5}L^{0.5}$  (average 0.90 m, 1893 W across subjects). Quantities were then reported in  
128   dimensional form by multiplying by the mean normalization factor across subjects.

129  
130   We tested whether terrain conditions affected energy expenditure and gait parameters. We calculated the  
131   mean and standard deviation of the measures across subjects for each terrain surface. Differences between

132 the conditions were quantified by repeated-measures ANOVA tests. We also tested the correlation  
133 between energy expenditure and the gait parameters using linear regression for each variable individually.  
134 The latter included a separate offset constant for each individual, included in the fit, with overall goodness  
135 of fit therefore evaluated with an adjusted  $R^2$ . The significance level  $\alpha$  was set at 0.05.

136  
137 To explore reduction of dimensionality within the data, we also performed principal components analysis  
138 (PCA) and linear discriminant analysis (LDA). The PCA was intended to reduce the 11-dimensional  
139 stride measures into a smaller number of combinations, and reveal which combinations contribute most to  
140 the observed variations, without regard to terrain type. The LDA (using only linear terms for each  
141 predictor) was performed to use the same data to classify the terrains, with knowledge of each trial's  
142 terrain included. Finally, an additional set of regressions was performed between metabolic rate and stride  
143 measures, using principal components regression (PCR) and partial least squares regression (PLSR), to  
144 determine how a small set of data combinations can predict metabolic rate, again with adjusted  $R^2$  to  
145 evaluate goodness of fit.

146

## 147 Results

148 We found the foot paths to be highly dependent on terrain. This was observable qualitatively in the foot  
149 paths, which showed changes in variability compared to the Sidewalk condition as viewed from the side  
150 and above (see Figure 3 for representative paths). Such terrain-related differences were also confirmed  
151 quantitatively for most of the stride parameters considered (Figure 4), particularly the measures of virtual  
152 clearance (mean changing by up to 58% and variability by up to 63%), and to lesser degree, lateral swing  
153 displacement (mean and variability, summarized in Table 1).

154

155 Participants also expended varying amounts of energy as a function of terrain (Figure 4, top). Net  
156 metabolic rate  $\dot{E}_{\text{met}}$  varied with terrain type for groupwise (repeated measures ANOVA,  $P = 7.1\text{e-}11$ ) and  
157 for most pair-wise comparisons (post hoc paired t-tests,  $P < 0.05$ ), with the greatest difference (27%)  
158 found between Woodchips and Sidewalk. The only non-significant comparisons were Dirt vs. Sidewalk,  
159 Gravel vs. Dirt, and Grass vs. Gravel ( $P \geq 0.05$ ). Summary results below are presented in order of  
160 increasing mean metabolic rate: Sidewalk, Dirt, Gravel, Grass, Woodchips.

161

162 Stride parameters also correlated with metabolic rate irrespective of terrain classification. From linear  
163 regression, nearly every stride measure was found to be significantly correlated to metabolic rate  $\dot{E}_{\text{met}}$   
164 (Table 2); the only non-significant measures ( $P \geq 0.05$ ) were mean walking speed and lateral swing (mean  
165 and variability). For goodness of fit, the top four correlates were mean virtual clearance, and RMS

166 variabilities of virtual clearance, stride height, and stride width. These measures were all strongly  
167 significant regressors (at most  $P = 3.1E-06$ ), although the actual predictive ability was modest, with  
168 adjusted  $R^2$  ranging 0.29 – 0.38). Part of the variation within the data may be attributed to inter-subject  
169 differences. This was revealed by improved fits (Table 2, “Ind  $R^2$ ”) when subject-specific offsets were  
170 removed from metabolic data, yielding for example an increase of 0.15 (i.e. a partial  $R^2$ ) for mean virtual  
171 clearance.

172  
173 Principal components analysis revealed that the first two PCs could explain a substantial fraction of the  
174 observed stride measures (Figure 5). The first PC accounted for 65.8% of all terrain-specific variability in  
175 the stride measures, and was dominated by increased stride length, increased walking speed, and negative  
176 stride height (apparent downhill slope). The second PC accounted for an additional 21.7% (and thus both  
177 PCs 87.5%), and was dominated by increased stride length, increased stride height (apparent uphill slope),  
178 and increased stride width variability. These two PCs (together accounting for 87.5% of all data  
179 variability) were subsequently used as regressors of metabolic rate.

180  
181 Linear discriminants were able to classify the data reasonably well (Figure 5), with 10% resubstitution  
182 error rate (5 errors out of 50 observations from 5 terrains and 10 subjects). This was true despite  
183 substantial overlap between terrains and subjects in individual measures such as stride length vs. speed  
184 (Fig. 6, top). To illustrate the classification, we projected the stride measure data onto two sample  
185 discriminants: Gravel vs. Grass, and Sidewalk vs. Dirt, two pairs poorly distinguished by the individual  
186 stride measures. The discriminated data (Fig. 6, bottom) show reasonably good discrimination between  
187 those same pairs.

188  
189 Although we attempted to approximately control the average walking speed, there was some variation  
190 within each trial. Walking speed normally fluctuates slightly [29], with correlated fluctuations in stride  
191 length [16] consistent with the preferred stride length relationship [30]. Some individuals exhibited  
192 terrain-dependence in their relationship (Figure 6, top), but with no consistent statistical trend across  
193 subjects. Thus, the preferred stride length vs. speed relationship remained fairly intact across different  
194 terrains. There were also small but significant differences in mean speed and stride length across terrains  
195 (Table 1).

196  
197 Metabolic rate was explained reasonably well with all three methods considered (Fig. 7). The best  
198 explanation resulted from partial least squares regression (PLSR), which uses all stride measures and  
199 metabolic outcome data together to define a set of multivariate regressors (defined in Table 2). This

200 technique yielded adjusted  $R^2 = 0.52$  to predict metabolic rate using only two such regressor components.  
201 In contrast, principal components regression (PCR) first derives principal components to explain  
202 variations within the stride measure data (without considering outcome data), and then uses those  
203 components for regression. Using only the first two PCs (described above), PCR yielded  $R^2 = 0.46$  (see  
204 Table 2). Both of these exceed the fit for the strongest single univariate regression (virtual clearance, with  
205  $R^2 = 0.34$ ). As few as two multivariate regressors can therefore explain a greater proportion of the  
206 variations in the outcome data, compared to any single measure.

207

## 208 Discussion

209 This study tested for relationships among the foot's path and placement, the type of ground terrain, and  
210 the energy expended for walking. We found that multiple stride parameters are indeed terrain-dependent  
211 and correlated with energy cost. Notably, more challenging terrain caused increases in virtual ground  
212 clearance and in the variability of most measures, for example of lateral swing motion. These measures  
213 were in turn correlated with increased energy cost. Any single measure could only predict metabolic rate  
214 imperfectly, but there was also considerable interdependency among measures, as revealed by  
215 dimensionality reduction techniques. We found that both principal components analysis and partial least  
216 squares regression could yield reasonable predictions of metabolic cost based on as little as two  
217 multivariate components. We next provide our interpretation of the relationship between stride measures  
218 and metabolic cost on different terrains, and their possible utility.

219

220 Participants made only subtle changes to their average gait pattern as a function of terrain. Most notable  
221 was virtual clearance of the swing foot, which increased on more challenging terrain (Table 1), and was  
222 highly correlated with energy expenditure (Table 2). The latter is consistent with controlled experiments  
223 showing a high cost for increased clearance [21]. Of course, the details of actual surface variations were  
224 unknown, and so virtual clearance is merely an indicator of possible adaptations to true ground clearance.  
225 There were also small changes in stride length and speed with terrain, which may be attributable in part to  
226 imperfectly controlled walking speed rather than the terrain itself.

227

228 While the average gait pattern changed little, variability in most of the gait measures examined showed  
229 high dependence on terrain. The most notable sensitivities were for variability in stride height, stride  
230 width, virtual clearance, and lateral swing motion. Variability could result directly from the unevenness of  
231 ground, or from controlled adjustments made to stabilize balance, which is thought to be passively  
232 unstable in the lateral direction [22,23]. Active stabilization is achieved in part through lateral foot  
233 placement [23,31–34]. Uneven ground appears to disrupt gait to substantial degree, and would be

234 expected to require substantial active stabilization. Aggregating these various contributions, the overall  
235 effect is that uneven ground leads to uneven foot motion and uneven steps.

236

237 Stride measures also appear to be predictive of energy expenditure. Nearly every stride measure exhibited  
238 significant correlation with energy expenditure, most strongly the RMS variabilities of stride height,  
239 virtual clearance, and stride width (Table 2). Walking speed is generally a strong predictor of energy cost  
240 [5,35]. Our interest here was in factors other than speed, which we therefore attempted to control at fixed  
241 value across terrains (e.g. 0.5% speed difference between Woodchips and Sidewalk). Thus, the weak and  
242 non-significant correlation between speed and energy cost (Table 2) was merely a consequence of  
243 experimental control rather than a finding. Walking speed also generally determines stride length  
244 [16,29,36], which was not explicitly controlled and differed slightly with terrain. By itself, stride length  
245 was a barely significant correlate of energy cost (Table 2), which could be due in part to an actual effect,  
246 and in part to imperfect experimental control of speed. Indeed, co-variation of speed and stride length  
247 dominated the first principal component of stride measures (Fig. 5), and predicted energy expenditure  
248 from the principal components regression (PCR, Fig. 7). In addition, all stride variability measures were  
249 individually correlated with energy cost (Table 2), although they contributed relatively little to the first  
250 two principal components. Variability in stride length and timing [37] and fluctuations in speed [24] have  
251 been reported to affect metabolic cost, perhaps due to the effort of varying gait. These results illustrate the  
252 importance of interdependencies among stride parameters, and the complex relationship of cost to gait  
253 parameters.

254

255 Another well-known predictor of energy expenditure is elevation change. Even though elevation changes  
256 were modest on the terrains studied here, a non-zero stride height would generally be expected to indicate  
257 how much the body is lifted or lowered against gravity, and therefore drive energy expenditure. Other  
258 cost-determining variables more specific to terrain included virtual clearance and its variability, and  
259 variability of stride height and width. If a single predictor is desired that is both sensitive to terrain and  
260 predictive of energy expenditure, the strongest candidate is virtual clearance (Fig. 7), followed by lateral  
261 swing variability, which may be an indicator of the balancing challenges posed by uneven ground.

262 Alternatively, the PCR and PSLR results show that IMU-derived foot paths can also yield multivariate  
263 components, or linear combinations of measures, that can be more reliably predictive than any single  
264 variable. Of course, IMU-based measures are unlikely to replicate the accuracy of a (portable)  
265 respirometry system, but IMUs are less obtrusive and easier to wear, especially in real-world conditions,  
266 and may still yield data informative of metabolic cost.

267



268 Stride measures may also serve as a supplement to terrain classification. A terrain such as “grass” can  
269 vary substantially in height, thickness, density, and underlying substrate, which itself may vary in  
270 softness, granularity, friction, and moisture content. Even if terrain were accurately imaged and quantified  
271 for geometric scale and irregularity [38], there may be a plethora of variables relevant to gait. In contrast,  
272 a few stride measures, such as stride and swing foot variability (Figs. 5 and 6) can directly measure a  
273 terrain’s effect on gait, and even discriminate among terrains. Gait measures are unlikely to discriminate  
274 better than visual observation, but they do offer continuous quantification of a terrain’s effects. Just as the  
275 classification of “highway” might be supplemented by information about traffic and road conditions, a  
276 prospective hiker or trekker might gain from knowledge of a “grass” trail’s typical effects on stride  
277 variability, time to destination, or metabolic cost (Fig. 7). There may well be benefit to quantifying terrain  
278 by entire new continuous measures or discrete categorizations, independent of semantic classifications.

279  
280 This work is subject to a number of limitations. We based our analysis on a relatively small number of  
281 summary measures, but a more intensive approach might be to instead use the actual foot path trajectories  
282 directly, including both translation and orientation data. The much larger volume of source data, with  
283 appropriate data reduction, might yield stronger classifiers and correlators. Another limitation of the  
284 present foot path reconstruction technique is that measurement errors are unavoidably greater than those  
285 typical for laboratory motion capture. Our foot path estimation relies on the foot being nearly stationary at  
286 some point during stance, which may not occur for every stride on softer terrains such as Woodchips.  
287 This adds significant uncertainty to estimates of stride height and its variability in these conditions.  
288 Indeed, all of the variability reported here is in part due to terrain, inertial drift, and other measurement  
289 noise, in addition to true motion variability. In particular, there can be vast variations between terrains of  
290 a single type such as Sidewalk. Each location in the world, whatever its classification, may have unique  
291 effects on gait, that may nonetheless be quantifiable.

292  
293 There are also limitations to the degree that kinematic measures can explain energy expenditure. Energy  
294 cost depends considerably on mechanical work performed by the body [39], even on uneven terrain [7],  
295 but foot paths cannot capture the force or power produced by the leg. In addition, inertial data cannot  
296 readily discern step width, which also appears to change on uneven terrain [7] and could contribute to  
297 energy cost [18]. Thus, IMU-derived foot paths are neither absolute nor comprehensive measures. More  
298 complete kinematic data are obtainable with IMU suits (e.g., Perception Neuron suit, Noitom Ltd, Miami  
299 FL USA), which might improve upon our results. We find that foot-mounted IMUs appropriately meet  
300 the trade-off between data quantity and convenience and practicality for real-world usage.

301

302 An improved study would include more variables than examined here. This could include more  
303 challenging terrain with significant speed and elevation variations, or with carried loads, to evaluate the  
304 interactions that determine energy expenditure [5,40,41]. Measures of gait and energy expenditure could  
305 conceivably be combined with geographical information systems (GIS) technology and embedded into  
306 map databases [42]. Although foot motion hardly encompasses all of the gait adaptations for terrain, it is  
307 highly sensitive to the type of terrain, and has a discrete ability to categorize or discriminate terrains  
308 objectively. It also exhibits a continuous correlation with energy expenditure, which could potentially  
309 have predictive applications.

310

311

312 Acknowledgements

313 This work was supported in part by Department of Defense (W81XWH-09-2-0142), National Institutes of  
314 Health (AG030815), and Office of Naval Research (ETOWL).

## 315 References

- 316 1. Lejeune TM, Willems PA, Heglund NC. Mechanics and energetics of human locomotion on sand. *J*  
317 *Exp Biol.* 1998;201: 2071–2080.
- 318 2. Soule RG, Goldman RF. Terrain coefficients for energy cost prediction. *J Appl Physiol.* 1972;32:  
319 706–708.
- 320 3. Pandolf KB, Haisman MF, Goldman RF. Metabolic energy expenditure and terrain coefficients for  
321 walking on snow. *Ergonomics.* 1976;19: 683–690. doi:10.1080/00140137608931583
- 322 4. Pandolf KB, Givoni B, Goldman RF. Predicting energy expenditure with loads while standing or  
323 walking very slowly. *J Appl Physiol.* 1977;43: 577–581.
- 324 5. Soule RG, Pandolf KB, Goldman RF. Energy expenditure of heavy load carriage. *Ergonomics.*  
325 1978;21: 373–381. doi:10.1080/00140137808931734
- 326 6. Winter DA. *Biomechanics and motor control of human movement.* Hoboken New Jersey: Wiley;  
327 2009.
- 328 7. Voloshina AS, Kuo AD, Daley MA, Ferris DP. Biomechanics and energetics of walking on uneven  
329 terrain. *J Exp Biol.* 2013;216: 3963–3970. doi:10.1242/jeb.081711
- 330 8. Brooks AG, Gunn SM, Withers RT, Gore CJ, Plummer JL. Predicting walking METs and energy  
331 expenditure from speed or accelerometry. *Med Sci Sports Exerc.* 2005;37: 1216–1223.
- 332 9. Crouter SE, Clowers KG, Bassett DR. A novel method for using accelerometer data to predict energy  
333 expenditure. *J Appl Physiol Bethesda Md* 1985. 2006;100: 1324–1331.  
334 doi:10.1152/jappphysiol.00818.2005
- 335 10. Kuffel EE, Crouter SE, Haas JD, Frongillo EA, Bassett DR. Validity of estimating minute-by-minute  
336 energy expenditure of continuous walking bouts by accelerometry. *Int J Behav Nutr Phys Act.*  
337 2011;8: 92. doi:10.1186/1479-5868-8-92
- 338 11. Montoye HJ, Washburn R, Servais S, Ertl A, Webster JG, Nagle FJ. Estimation of energy expenditure  
339 by a portable accelerometer. *Med Sci Sports Exerc.* 1983;15: 403–407.
- 340 12. Tudor-Locke C, Williams JE, Reis JP, Pluto D. Utility of pedometers for assessing physical activity:  
341 convergent validity. *Sports Med Auckl NZ.* 2002;32: 795–808.
- 342 13. Hendelman D, Miller K, Baggett C, Debold E, Freedson P. Validity of accelerometry for the  
343 assessment of moderate intensity physical activity in the field. *Med Sci Sports Exerc.* 2000;32: S442-  
344 449.
- 345 14. Ojeda L, Borenstein J. Non-GPS navigation for security personnel and first responders. *J Navig.*  
346 2007;60: 391.
- 347 15. Rebula JR, Ojeda LV, Adamczyk PG, Kuo AD. Measurement of foot placement and its variability  
348 with inertial sensors. *Gait Posture.* 2013;38: 974–980. doi:10.1016/j.gaitpost.2013.05.012
- 349 16. Ojeda LV, Rebula JR, Kuo AD, Adamczyk PG. Influence of contextual task constraints on preferred  
350 stride parameters and their variabilities during human walking. *Med Eng Phys.* 2015;37: 929–936.  
351 doi:10.1016/j.medengphy.2015.06.010
- 352 17. Margaria R. *Biomechanics and energetics of muscular exercise.* Oxford, London; 1976.
- 353 18. Donelan JM, Kram R, Kuo AD. Mechanical and metabolic determinants of the preferred step width in  
354 human walking. *Proc R Soc Lond B.* 2001;268: 1985–1992. doi:10.1098/rspb.2001.1761
- 355 19. Donelan JM, Kram R, Kuo AD. Mechanical work for step-to-step transitions is a major determinant  
356 of the metabolic cost of human walking. *J Exp Biol.* 2002;205: 3717–27.
- 357 20. Gates DH, Wilken JM, Scott SJ, Sinitski EH, Dingwell JB. Kinematic strategies for walking across a  
358 destabilizing rock surface. *Gait Posture.* 2012;35: 36–42. doi:10.1016/j.gaitpost.2011.08.001
- 359 21. Wu AR, Kuo AD. Energetic tradeoffs of foot-to-ground clearance during swing phase of walking.  
360 Columbus, OH; 2015.
- 361 22. Kuo AD. Stabilization of lateral motion in passive dynamic walking. *Int J Robot Res.* 1999;18: 917–  
362 930.
- 363 23. Bauby CE, Kuo AD. Active control of lateral balance in human walking. *J Biomech.* 2000;33: 1433–  
364 1440.

- 365 24. Seethapathi N, Srinivasan M. The metabolic cost of changing walking speeds is significant, implies  
366 lower optimal speeds for shorter distances, and increases daily energy estimates. *Biol Lett.* 2015;11:  
367 20150486.
- 368 25. Adamczyk PG, Collins SH, Kuo AD. The advantages of a rolling foot in human walking. *J Exp Biol.*  
369 2006;209: 3953–3963.
- 370 26. Brockway JM. Derivation of formulae used to calculate energy expenditure in man. *Hum Nutr Clin*  
371 *Nutr.* 1987;41: 463–471.
- 372 27. Mariani B, Rochat S, Büla CJ, Aminian K. Heel and toe clearance estimation for gait analysis using  
373 wireless inertial sensors. *IEEE Trans Biomed Eng.* 2012;59: 3162–3168.  
374 doi:10.1109/TBME.2012.2216263
- 375 28. Hof AL. Scaling gait data to body size. *Gait Posture.* 1996;4: 222–223. doi:10.1016/0966-  
376 6362(95)01057-2
- 377 29. Collins SH, Kuo AD. Two independent contributions to step variability during over-ground human  
378 walking. *PloS One.* 2013;8: e73597. doi:10.1371/journal.pone.0073597
- 379 30. Grieve DW. Gait patterns and the speed of walking. *Biomed Eng.* 1968;3: 119–122.
- 380 31. Bruijn SM, van Dieën JH. Control of human gait stability through foot placement. *J R Soc Interface.*  
381 2018;15: 20170816. doi:10.1098/rsif.2017.0816
- 382 32. O’Connor SM, Kuo AD. Direction-dependent control of balance during walking and standing. *J*  
383 *Neurophysiol.* 2009;102: 1411–1419. doi:10.1152/jn.00131.2009
- 384 33. Reimann H, Fettrow T, Jeka JJ. Strategies for the Control of Balance During Locomotion. *Kinesiol*  
385 *Rev.* 2018;7: 18–25. doi:10.1123/kr.2017-0053
- 386 34. Wang Y, Srinivasan M. Stepping in the direction of the fall: the next foot placement can be predicted  
387 from current upper body state in steady-state walking. *Biol Lett.* 2014;10: 20140405.  
388 doi:10.1098/rsbl.2014.0405
- 389 35. Elftman H. Biomechanics of muscle. *J Bone Jt Surg.* 1966;48-A: 363–377.
- 390 36. Snaterse M, Ton R, Kuo AD, Donelan JM. Distinct fast and slow processes contribute to the selection  
391 of preferred step frequency during human walking. *J Appl Physiol Bethesda Md* 1985. 2011;110:  
392 1682–1690. doi:10.1152/jappphysiol.00536.2010
- 393 37. O’Connor SM, Xu HZ, Kuo AD. Energetic cost of walking with increased step variability. *Gait*  
394 *Posture.* 2012;36: 102–107. doi:10.1016/j.gaitpost.2012.01.014
- 395 38. Russ JC. *Fractal surfaces.* Springer Science & Business Media; 2013.
- 396 39. Kuo AD, Donelan JM, Ruina A. Energetic consequences of walking like an inverted pendulum: step-  
397 to-step transitions. *Exerc Sport Sci Rev.* 2005;33: 88–97.
- 398 40. Huang T-WP, Kuo AD. Mechanics and energetics of load carriage during human walking. *J Exp Biol.*  
399 2013;217: 605–613. doi:10.1242/jeb.091587
- 400 41. Soule RG, Goldman RF. Energy cost of loads carried on the head, hands, or feet. *J Appl Physiol.*  
401 1969;27: 687–90.
- 402 42. Burrough PA, McDonnell R, Burrough PA, McDonnell R. Principles of geographical information  
403 systems. Oxford university press Oxford; 1998. Available: [http://dds.cepal.org/infancia/guide-to-](http://dds.cepal.org/infancia/guide-to-estimating-child-poverty/bibliografia/capitulo-IV/Burrough%20Peter%20A%20y%20McDonnell%20Rachael%20A%20(1998)%20Principles%20of%20geographical%20information%20systems.pdf)  
404 [estimating-child-poverty/bibliografia/capitulo-](http://dds.cepal.org/infancia/guide-to-estimating-child-poverty/bibliografia/capitulo-IV/Burrough%20Peter%20A%20y%20McDonnell%20Rachael%20A%20(1998)%20Principles%20of%20geographical%20information%20systems.pdf)  
405 [IV/Burrough%20Peter%20A%20y%20McDonnell%20Rachael%20A%20\(1998\)%20Principles%20o](http://dds.cepal.org/infancia/guide-to-estimating-child-poverty/bibliografia/capitulo-IV/Burrough%20Peter%20A%20y%20McDonnell%20Rachael%20A%20(1998)%20Principles%20of%20geographical%20information%20systems.pdf)  
406 [f%20geographical%20information%20systems.pdf](http://dds.cepal.org/infancia/guide-to-estimating-child-poverty/bibliografia/capitulo-IV/Burrough%20Peter%20A%20y%20McDonnell%20Rachael%20A%20(1998)%20Principles%20of%20geographical%20information%20systems.pdf)  
407

408 Table 1. Stride measures and energy expenditure for five terrains. Results are shown as mean  $\pm$  s.d. across  
 409 subjects ( $N = 10$ ). Significance (S) of each measure indicated by asterisk ‘\*’ (repeated measures ANOVA,  
 410  $P < 0.05$ ).  
 411

412

| Measure                |      | Sidewalk           | Dirt               | Gravel            | Grass             | Woodchips         | S | <i>P</i> |
|------------------------|------|--------------------|--------------------|-------------------|-------------------|-------------------|---|----------|
| Virtual Clearance (m)  | Mean | 0.031 $\pm$ 0.008  | 0.033 $\pm$ 0.009  | 0.041 $\pm$ 0.009 | 0.049 $\pm$ 0.008 | 0.050 $\pm$ 0.009 | * | 4.66e-08 |
|                        | RMS  | 0.006 $\pm$ 0.001  | 0.006 $\pm$ 0.002  | 0.007 $\pm$ 0.001 | 0.010 $\pm$ 0.002 | 0.011 $\pm$ 0.003 | * | 3.70e-04 |
| Lateral Swing (m)      | Mean | 0.039 $\pm$ 0.015  | 0.040 $\pm$ 0.013  | 0.043 $\pm$ 0.016 | 0.039 $\pm$ 0.012 | 0.043 $\pm$ 0.016 | * | 1.28e-12 |
|                        | RMS  | 0.016 $\pm$ 0.003  | 0.017 $\pm$ 0.003  | 0.019 $\pm$ 0.003 | 0.019 $\pm$ 0.004 | 0.020 $\pm$ 0.004 | * | 6.69e-05 |
| Stride Height (m)      | Mean | -0.004 $\pm$ 0.021 | -0.013 $\pm$ 0.019 | 0.056 $\pm$ 0.027 | 0.038 $\pm$ 0.028 | 0.019 $\pm$ 0.062 |   | 1.74e-01 |
|                        | RMS  | 0.014 $\pm$ 0.002  | 0.016 $\pm$ 0.004  | 0.028 $\pm$ 0.003 | 0.031 $\pm$ 0.003 | 0.044 $\pm$ 0.008 |   | 2.84e-01 |
| Stride Length (m)      | Mean | 1.411 $\pm$ 0.069  | 1.470 $\pm$ 0.064  | 1.404 $\pm$ 0.096 | 1.440 $\pm$ 0.064 | 1.451 $\pm$ 0.054 | * | 1.84e-09 |
|                        | RMS  | 0.033 $\pm$ 0.005  | 0.027 $\pm$ 0.005  | 0.034 $\pm$ 0.005 | 0.038 $\pm$ 0.003 | 0.043 $\pm$ 0.005 |   | 6.35e-02 |
| Stride Width (m)       | RMS  | 0.051 $\pm$ 0.009  | 0.056 $\pm$ 0.006  | 0.066 $\pm$ 0.010 | 0.068 $\pm$ 0.008 | 0.099 $\pm$ 0.013 |   | 4.23e-01 |
| Speed (m/s)            | Mean | 1.281 $\pm$ 0.085  | 1.334 $\pm$ 0.089  | 1.263 $\pm$ 0.118 | 1.279 $\pm$ 0.085 | 1.287 $\pm$ 0.085 | * | 1.04e-13 |
|                        | RMS  | 0.048 $\pm$ 0.009  | 0.038 $\pm$ 0.006  | 0.047 $\pm$ 0.007 | 0.050 $\pm$ 0.004 | 0.059 $\pm$ 0.009 | * | 1.53e-04 |
| Net Metabolic Rate (W) | Mean | 189.1 $\pm$ 29.00  | 204.4 $\pm$ 35.96  | 218.9 $\pm$ 35.62 | 223.2 $\pm$ 28.27 | 240.8 $\pm$ 28.91 | * | 7.11e-11 |
| Net Cost of Transport  | Mean | 0.232 $\pm$ 0.036  | 0.241 $\pm$ 0.038  | 0.272 $\pm$ 0.033 | 0.275 $\pm$ 0.035 | 0.294 $\pm$ 0.031 | * | 3.28e-09 |

413

414 Table 2. Linear relationship between net metabolic rate (outcome variable) and individual stride  
 415 measures. Linear regression was performed on each measure, yielding a slope (with 95% confidence  
 416 intervals, c.i.) and constant offset, as well as adjusted  $R^2$  and individualized adjusted  $R^2$  (with separate  
 417 offset for each subject, “Ind”). The difference between individualized and traditional  $R^2$  indicates how  
 418 much of the variability was due to subject offsets, as opposed to terrain type. Significance ( $P < 0.05$ ) of  
 419 regression indicated by dagger ‘†’, and significant difference in regressor across terrains by asterisk ‘\*’  
 420 (identical to Table 1). Regression slopes are reported in units of W/m for all regressors except speed ( $W \cdot$   
 421  $s \cdot m^{-1}$ ), and offsets in units of W.  
 422

| Regressor         |      | Slope | ± | c.i.  | Offset | $R^2$ | Ind $R^2$ | S  | $P$      |
|-------------------|------|-------|---|-------|--------|-------|-----------|----|----------|
| Virtual clearance | Mean | 1714. | ± | 399.9 | 155.6  | 0.34  | 0.49      | †* | 2.63e-11 |
|                   | RMS  | 5948. | ± | 1657. | 182.5  | 0.29  | 0.46      | †* | 3.4e-09  |
| Lateral swing     | Mean | 89.05 | ± | 494.  | 224.6  | -0.01 | 0.00      | *  | 0.719    |
|                   | RMS  | 2329. | ± | 1729. | 187.4  | 0.06  | 0.07      | †* | 0.00937  |
| Stride height     | Mean | 167.3 | ± | 139.1 | 225.1  | -0.02 | 0.08      | †  | 0.0195   |
|                   | RMS  | 1410. | ± | 353.6 | 193.1  | 0.30  | 0.56      | †  | 2.05e-10 |
| Stride length     | Mean | 88.77 | ± | 86.88 | 102.3  | 0.38  | 0.03      | †* | 0.0454   |
|                   | RMS  | 1414. | ± | 820.2 | 174.3  | 0.02  | 0.18      | †  | 0.00113  |
| Stride width      | RMS  | 689.3 | ± | 262.6 | 185.1  | 0.14  | 0.35      | †  | 3.11e-06 |
| Speed             | Mean | 1.96  | ± | 68.6  | 226.3  | 0.19  | 0.00      | *  | 0.954    |
|                   | RMS  | 1067. | ± | 593.3 | 170.1  | 0.02  | 0.16      | †* | 0.000713 |

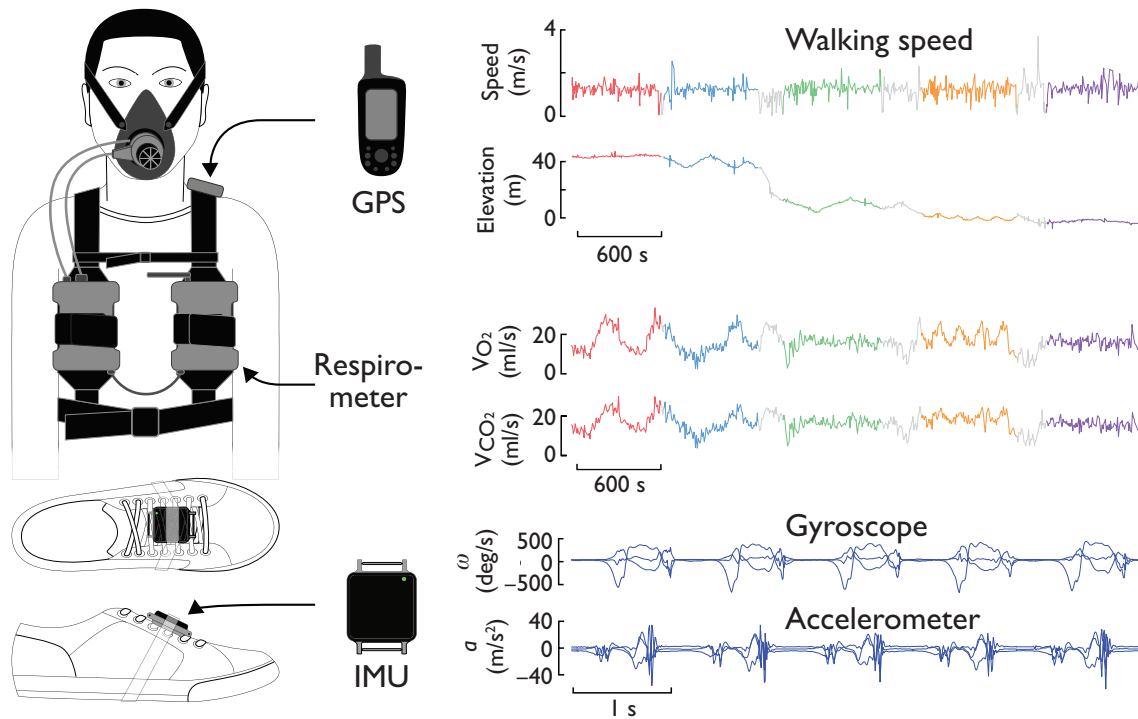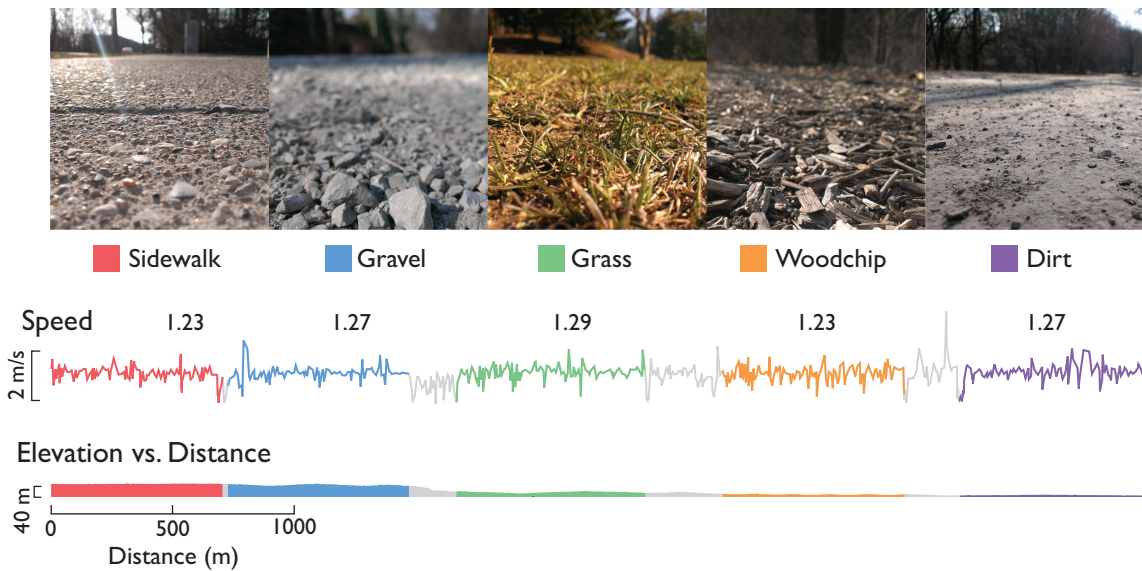

423

424 Figure 1. Measurement of foot paths and energy expenditure on outdoor terrain. Subjects walked on  
 425 different terrains while wearing a portable respirometry system, a global positioning system (GPS)  
 426 device, and one inertial measurement unit (IMU) per foot. Sample data from one subject show traces for  
 427 walking speed and elevation from GPS, rates of oxygen consumption and carbon dioxide production, and  
 428 angular velocity and translational acceleration vs. time. Terrains included Sidewalk, Gravel, Grass,  
 429 Woodchip, and Dirt, along with transitions between them (gray lines, not analyzed). Walking speed was  
 430 loosely regulated via GPS (average speeds listed); terrain segments were selected to avoid large net  
 431 changes in elevation during trials.

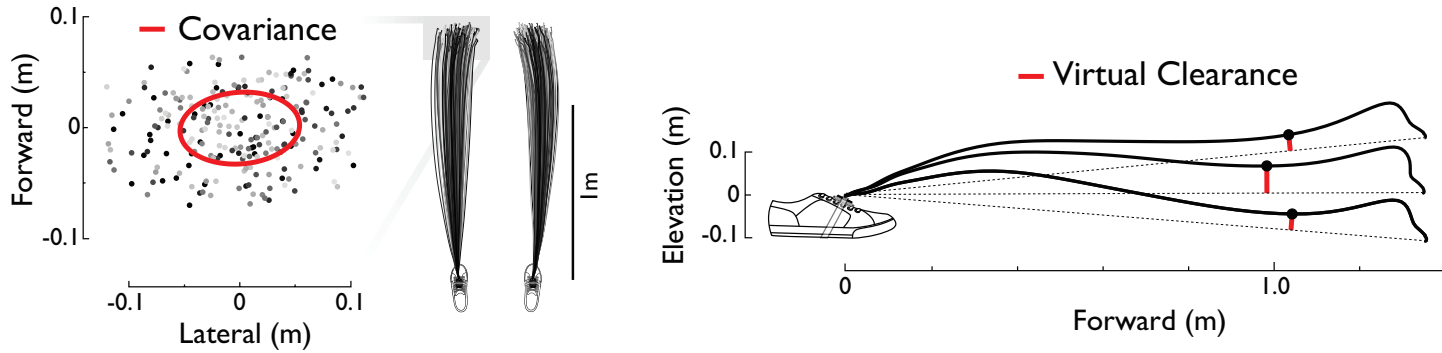

432

433 Figure 2. Sample foot path trajectories and associated measurements, as viewed from above and from the  
434 side. Forward vs. lateral foot displacements from each trial were used to compute stride covariances.  
435 Vertical path of foot was used to determine virtual clearance, relative to straight line between start and  
436 end of stride.

437

438

439

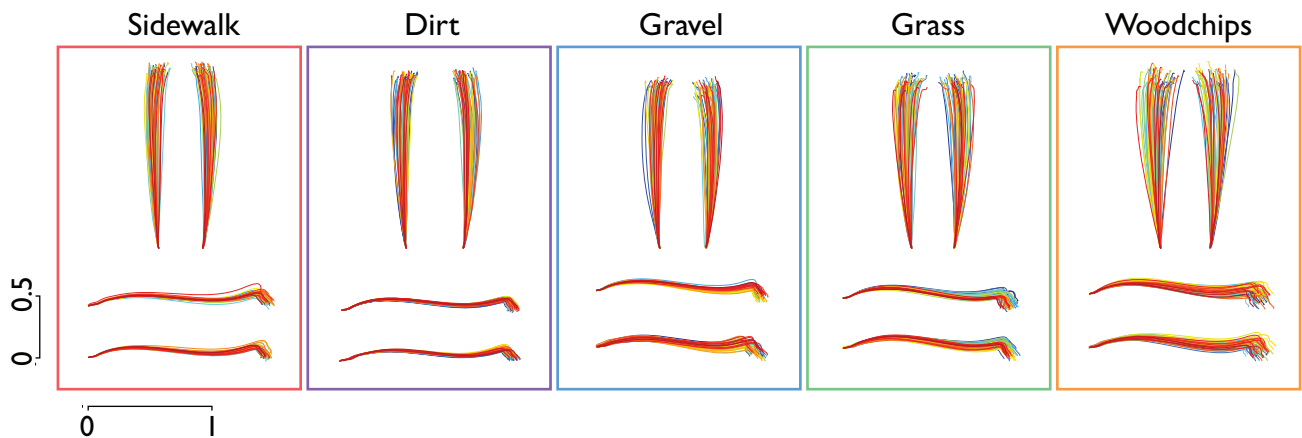

440

441 Figure 3. Representative foot path trajectories for each terrain (from one representative subject), as  
442 viewed from above and from side. All strides were arranged to have common origin, to emphasize  
443 variation among strides. Color of trajectories varies gradually between beginning (blue) and end (red) of  
444 trial, to indicate time course of strides.

445

446



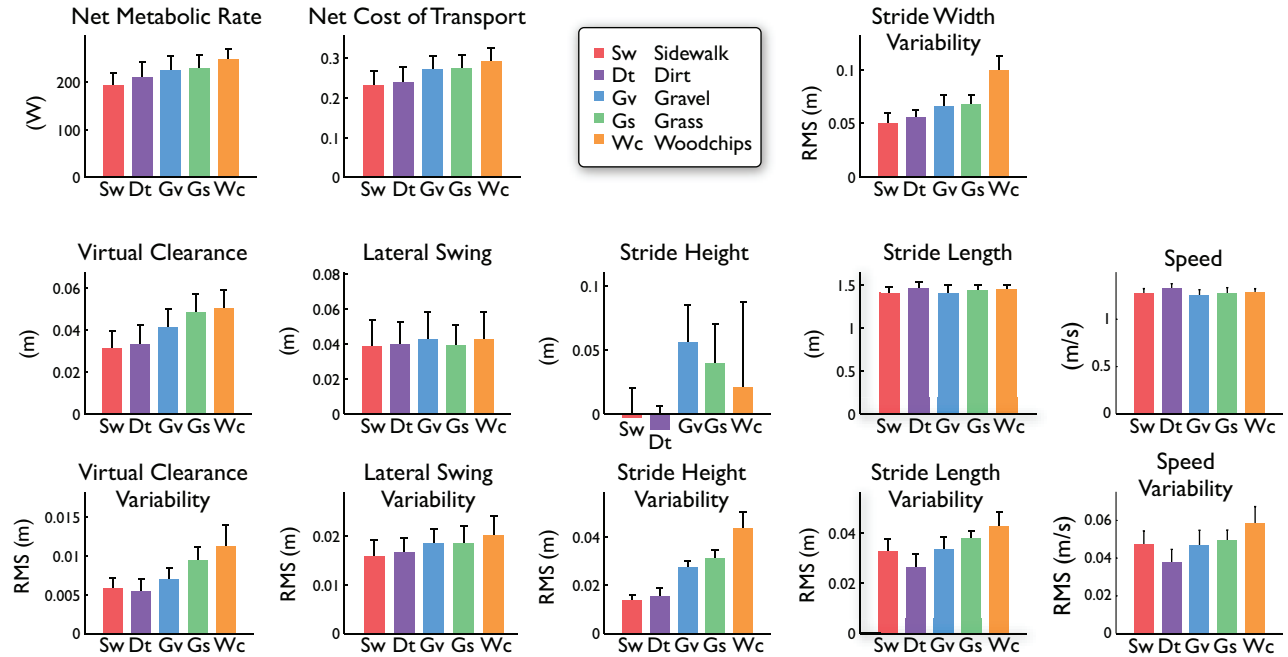

447

448 Figure 4. Summary measures of energetic cost and stride measures on five different terrains. Energy  
 449 expenditure in terms of net metabolic rate and net metabolic cost of transport (energy per unit distance  
 450 and weight). Stride measures are shown as mean and root-mean-square (RMS) variability: virtual  
 451 clearance, lateral swing distance, stride height, stride length, stride width (variability only), and walking  
 452 speed. Bars denote across-subject means; error bars denote standard deviation across subjects ( $N = 10$ ).  
 453

454

455

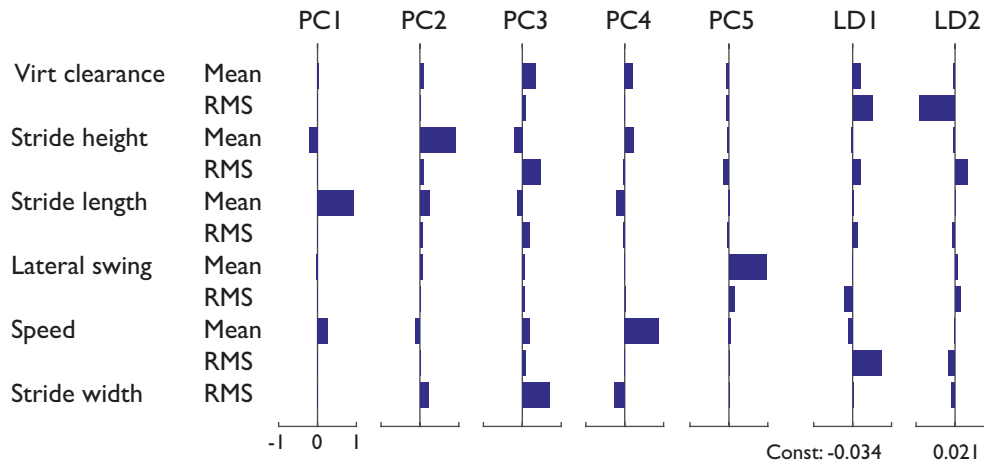

456

457 Figure 5. Principal components and linear discriminants of stride measures, shown as a series of columns  
 458 of horizontal bars, each row representing a stride measure. First five principal components (PCs) are  
 459 shown, as well as two linear discriminants, for (LD1) Gravel vs. Grass, and (LD2) Sidewalk vs. Dirt (with  
 460 constant offsets listed). Stride measures from all subjects and all terrains contributed to this analysis.

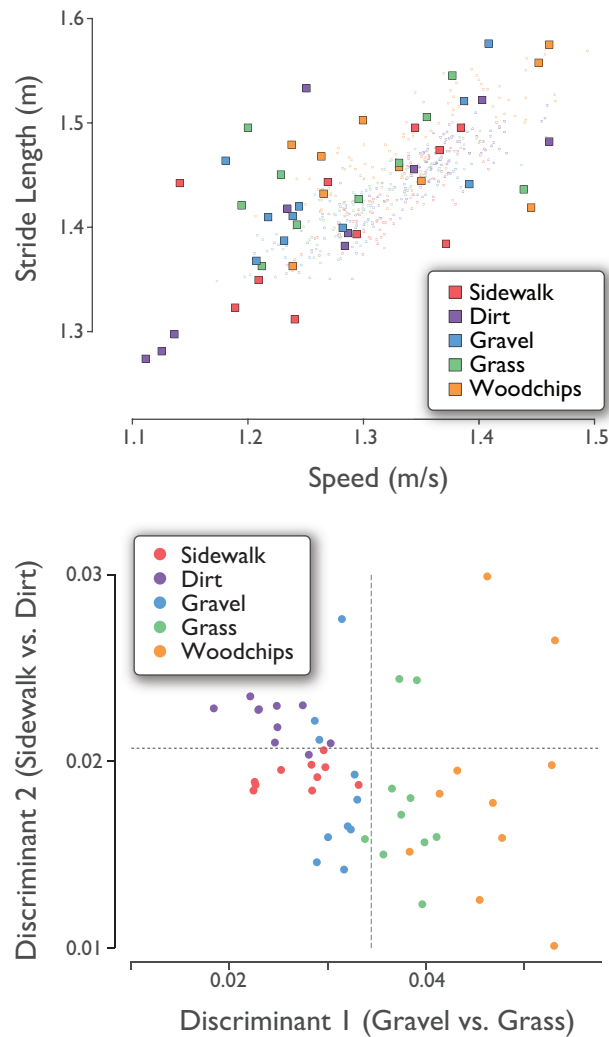

461

462 Fig. 6. Stride measures for all subjects ( $N = 10$ ) and all terrains, plotted in two ways: (top) Stride length  
463 vs. Speed, and (bottom) Linear discriminants against each other (i.e. a projection of multi-dimensional  
464 data onto two discriminants). Each data point represents one subject's average measures for one terrain.  
465 Stride lengths and speeds (filled symbols) were highly correlated with each other, and overlapped for  
466 different terrains. As an example of within-trial variations, top graph also shows all strides from all  
467 terrains for a single representative subject (smaller, lightly shaded symbols). Linear discriminants  
468 improve separation between two pairs of terrains (separators denoted by dashed lines).

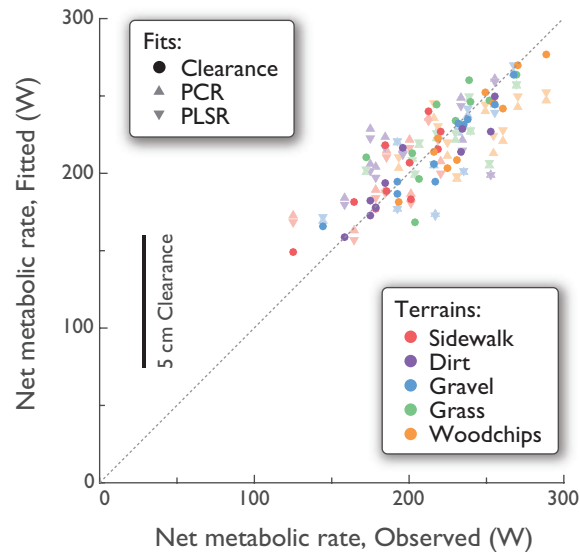

469

470 Figure 7. Net metabolic rate for all subjects and all terrains, fitted vs. observed. Observed refers to  
471 empirical measurements (five terrains,  $N = 10$  each). Fitted refers to three ways to predict metabolic rate:  
472 Principal components regression from first two PCs (PCR; adjusted  $R^2 = 0.46$ ); Partial least squares  
473 regression (PLSR; adjusted  $R^2 = 0.52$ ); and from virtual clearance in a single-variable linear regression  
474 (Clearance; overall adjusted  $R^2 = 0.34$ ; shown fitted with subject-specific offsets,  $R^2 = 0.49$ ). Fit types  
475 are denoted by symbol shape, and terrains by color.

476
